# Supplementary material for: Magnetoplasmonic photonic arrays for rapid and selective colorimetric detection of chloride ions in water
Source: Royal Society of Chemistry journal article supplement (doi:10.1039/d3ra06754h), 2023-01-01
Supplement: d3ra06754h1.pdf [file d3ra06754h1.pdf]

# **Magnetoplasmonic Photonic Arrays for Rapid and Selective Colorimetric Detection of Chloride Ions in Water**

Van Tan Tran<sup>a,\*</sup>, Van-Duong Dao<sup>a</sup>, Huu-Quang Nguyen<sup>b</sup>, Lemma Teshome Tufa<sup>b</sup>, Jaebeom  
Lee<sup>b</sup>, Van-Tuan Hoang<sup>c,\*\*</sup>, Anh-Tuan Le<sup>c,\*\*\*</sup>

<sup>a</sup>Faculty of Biotechnology, Chemistry and Environmental Engineering, Phenikaa University,  
Hanoi 12116, Viet Nam

<sup>b</sup>Department of Chemistry, Chemical Engineering and Applied Chemistry, Chungnam National  
University, Daejeon, 34134, Republic of Korea

<sup>c</sup>Phenikaa University Nano Institute (PHENA), PHENIKAA University, Hanoi 12116, Viet Nam

Corresponding authors:

\*[tan.tranvan@phenikaa-uni.edu.vn](mailto:tan.tranvan@phenikaa-uni.edu.vn) (V.T.Tran)

\*\*[tuan.hoangvan@phenikaa-uni.edu.vn](mailto:tuan.hoangvan@phenikaa-uni.edu.vn) (V.T.Hoang)

\*\*\*[tuan.leanh@phenikaa-uni.edu.vn](mailto:tuan.leanh@phenikaa-uni.edu.vn) (A.T.Le)

## Chemicals

Ferric nitrate nonahydrate ( $\text{Fe}(\text{NO}_3)_3 \cdot 9\text{H}_2\text{O}$ ), sodium citrate ( $\text{C}_6\text{H}_5\text{Na}_3\text{O}_7 \cdot 2\text{H}_2\text{O}$ ), sodium acetate ( $\text{CH}_3\text{COONa}$ , NaAc), silver nitrate ( $\text{AgNO}_3$ ), sodium chloride (NaCl), magnesium chloride ( $\text{MgCl}_2$ ), nickel(II) chloride ( $\text{NiCl}_2$ ), ammonium chloride ( $\text{NH}_4\text{Cl}$ ), zinc chloride ( $\text{ZnCl}_2$ ), cobalt chloride ( $\text{CoCl}_2$ ), barium chloride ( $\text{BaCl}_2$ ), strontium chloride ( $\text{SrCl}_2$ ), sodium nitrite ( $\text{NaNO}_2$ ), sodium fluoride (NaF), copper(II) sulfate ( $\text{CuSO}_4$ ), magnesium nitrate ( $\text{Mg}(\text{NO}_3)_2$ ), zinc sulfate ( $\text{ZnSO}_4$ ), and ethylene glycol (EG) were purchased from Sigma-Aldrich Inc. (Yong-In, South Korea). Citric acid ( $\text{C}_6\text{H}_8\text{O}_7$ ) was purchased from Hayashi Pure Chemical Ind., Ltd. (Japan). Nylon filter membrane (0.2  $\mu\text{m}$  pore size, 47 mm diameter) was purchased from Whatman (UK). Deionized (DI) water ( $>18 \text{ M}\Omega\text{cm}^{-1}$ ) was used for all solution preparations and experiments. All chemicals were analytical grade reagents and used as received without further purification.

## Synthesis of Ag@Fe<sub>3</sub>O<sub>4</sub> NPs

To synthesize NP<sub>175</sub>, 0.1 M of  $\text{Fe}(\text{NO}_3)_3 \cdot 9\text{H}_2\text{O}$  was fully dissolved in 40 mL of Ethylene Glycol (EG), followed by the addition of 0.875 M of Sodium Acetate (NaAc) and 14.75 mM of  $\text{AgNO}_3$ . This mixture was subjected to rigorous stirring for 60 minutes and then sealed in a Teflon-lined stainless-steel autoclave (50 mL in volume). The autoclave was heated to 210 °C for 12 hours before cooling to room temperature. The resulting black products were washed multiple times with ethanol and deionized (DI) water, then dried under vacuum conditions at 60 °C for 6 hours. NP<sub>150</sub>, NP<sub>185</sub>, NP<sub>200</sub>, and NP<sub>234</sub> were synthesized using the same procedure, but altering the  $\text{Fe}^{3+}$  precursor concentration. To make porous NP<sub>234</sub>, oxalic acid was added individually to solutions of the Ag@Fe<sub>3</sub>O<sub>4</sub> NPs (1 mg mL<sup>-1</sup>). The mixtures were sonicated for 90 min in a sonication bath and then washed with DI water (with the help of a magnet) at least

thrice. For citric stabilization of NPs, 15 mg of NPs were combined with 15 ml of 3 mM citric acid, followed by 2 hours of sonication using an ultrasonic probe. The NPs were collected and washed with DI water using a magnetic stirrer. The samples were then refrigerated (4 °C) for 6 hours before utilization.

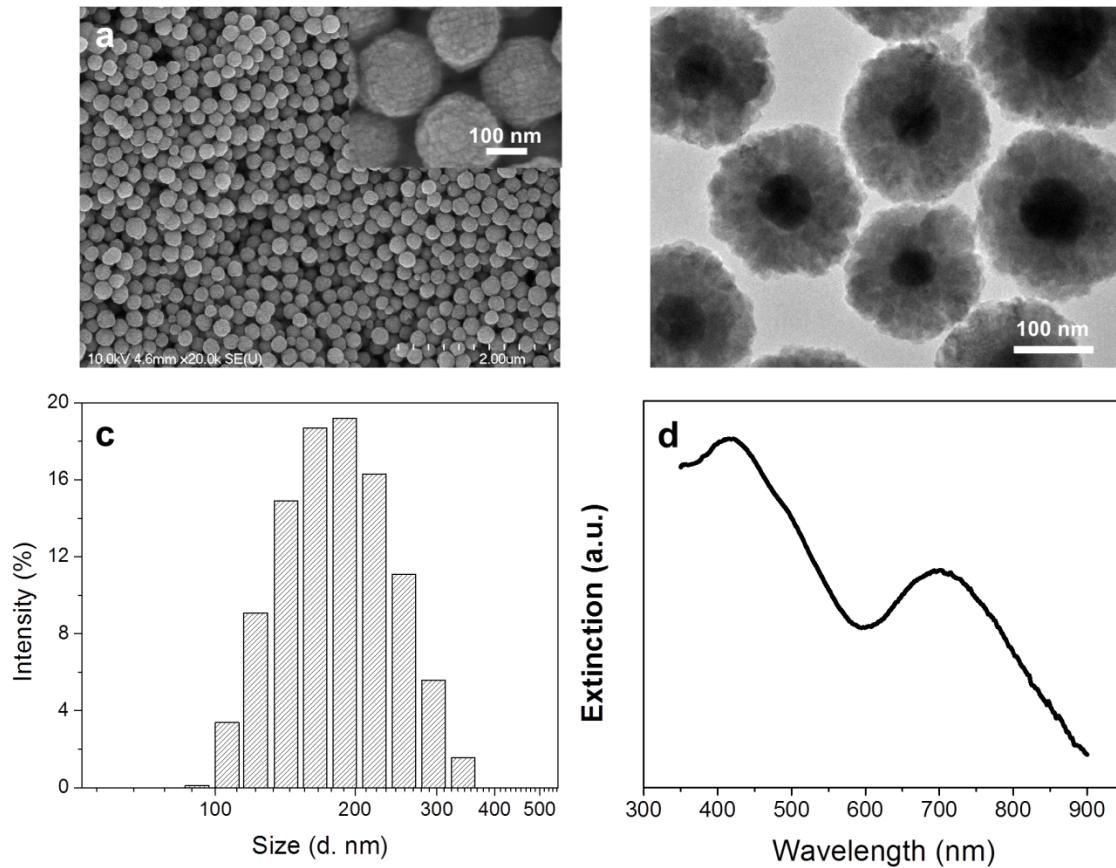

**Figure S1.** A) SEM, b) TEM images, c) size distribution histogram, and d) extinction spectra of NP<sub>175</sub>.

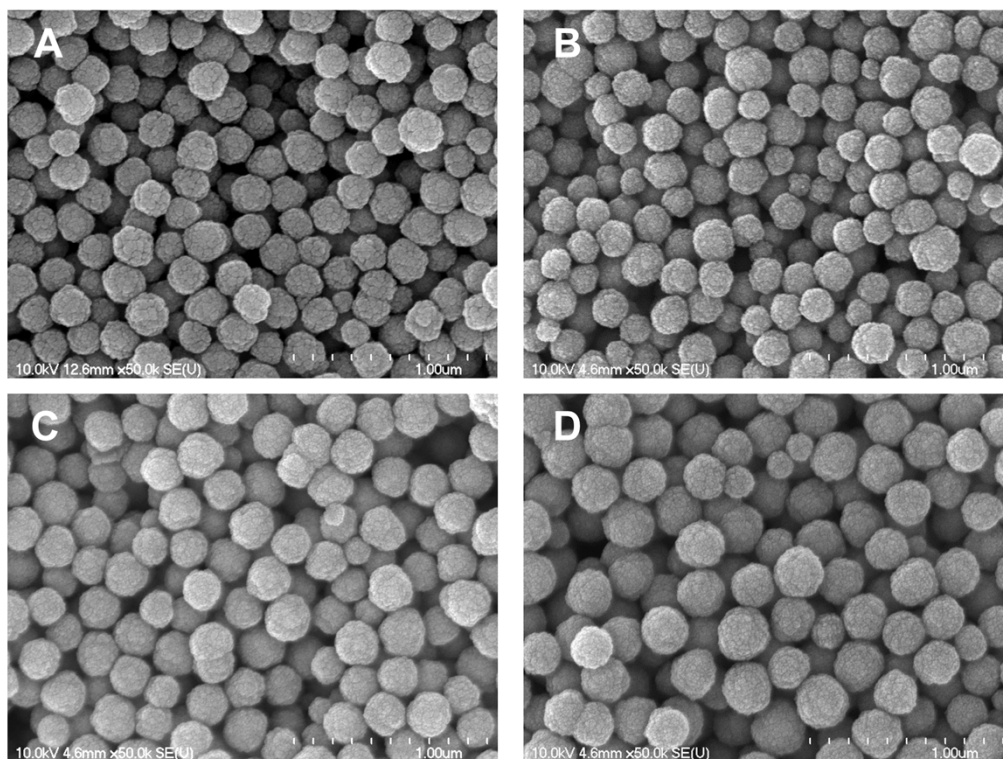

**Figure S2.** SEM images of different sized MagPlas NPs: a) NP<sub>150</sub>, b) NP<sub>175</sub>, c) NP<sub>184</sub>, and d) NP<sub>200</sub>.

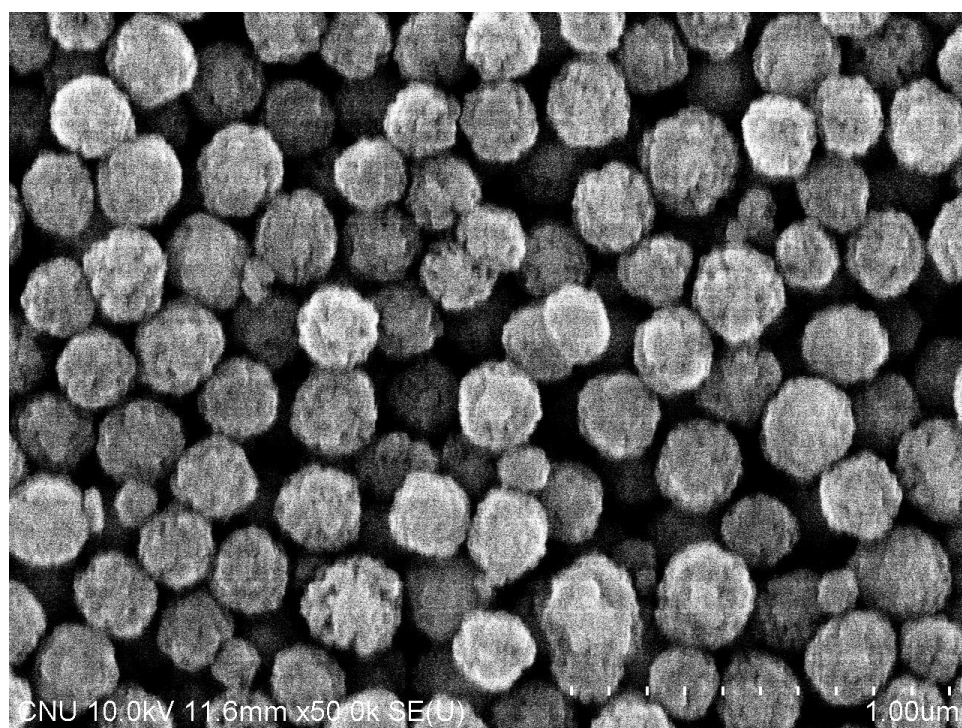

**Figure S3.** SEM image of porous 234 nm MagPlas NPs - NP<sub>234P</sub>.

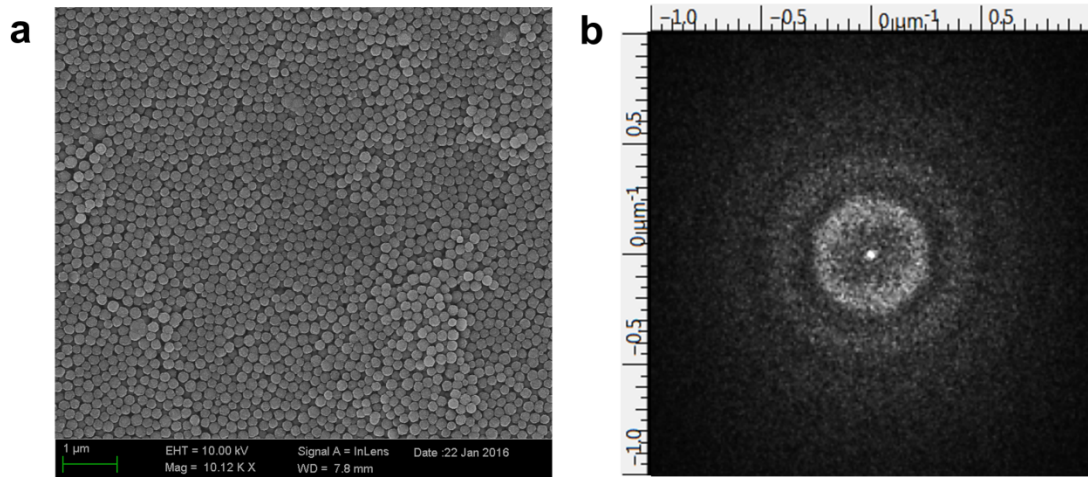

**Figure S4.** a) SEM image of MagPlas APAs and b) its corresponding fast Fourier transform (FFT) pattern.

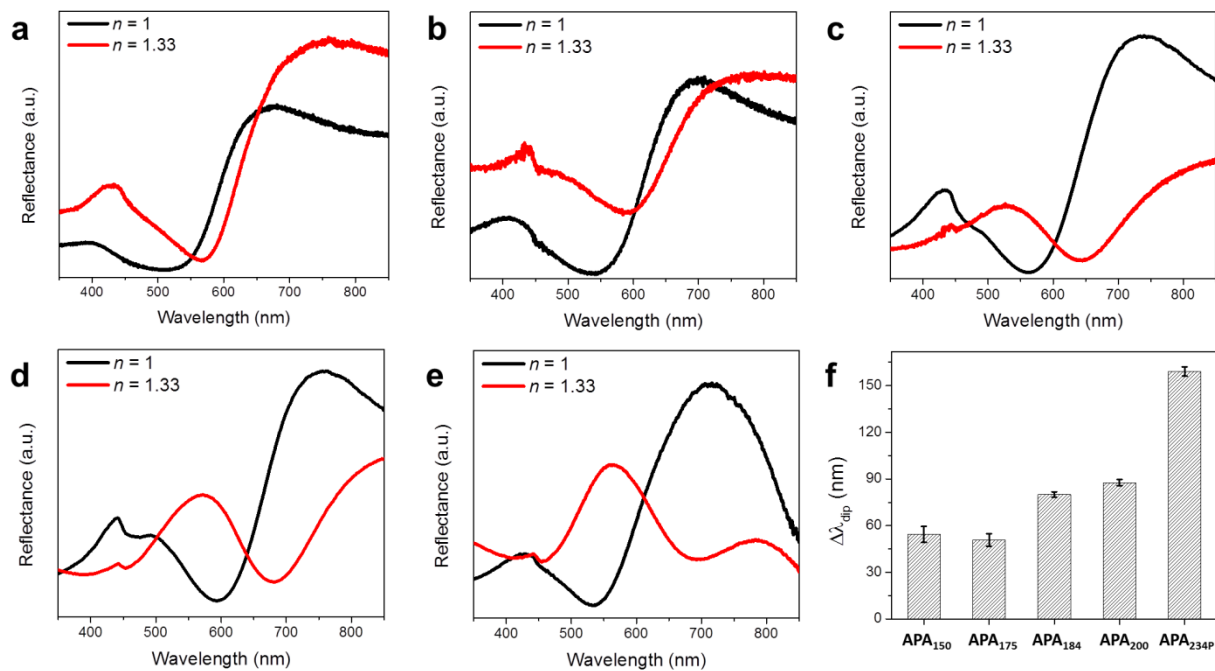

**Figure S5.** Reflectance spectra of APAs in dry ( $n = 1$ ) and wet ( $n = 1.33$ ) states: a) APA<sub>150</sub>, b) APA<sub>175</sub>, c) APA<sub>184</sub>, d) APA<sub>200</sub>, and e) APA<sub>234P</sub>. f) Wavelength shifts of reflectance dip of the APAs after wetting.

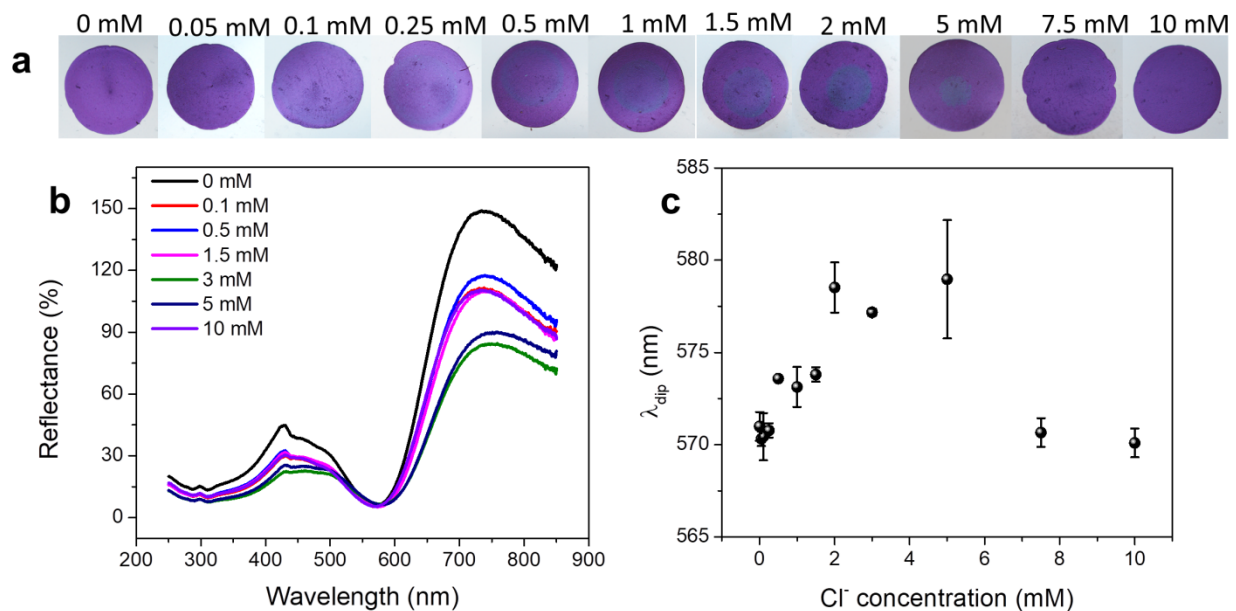

**Figure S6.** a) Photographs and b) reflectance spectra of MagPlas APA<sub>184</sub> impregnated with 50 mM AgNO<sub>3</sub> after adding solutions with different Cl<sup>-</sup> ion concentrations ( $C_{\text{Cl}}$ ). c) The dependence of  $\lambda_{\text{dip}}$  on Cl<sup>-</sup> ion concentrations of MagPlas APA<sub>184</sub> impregnated with 50 AgNO<sub>3</sub> concentration.

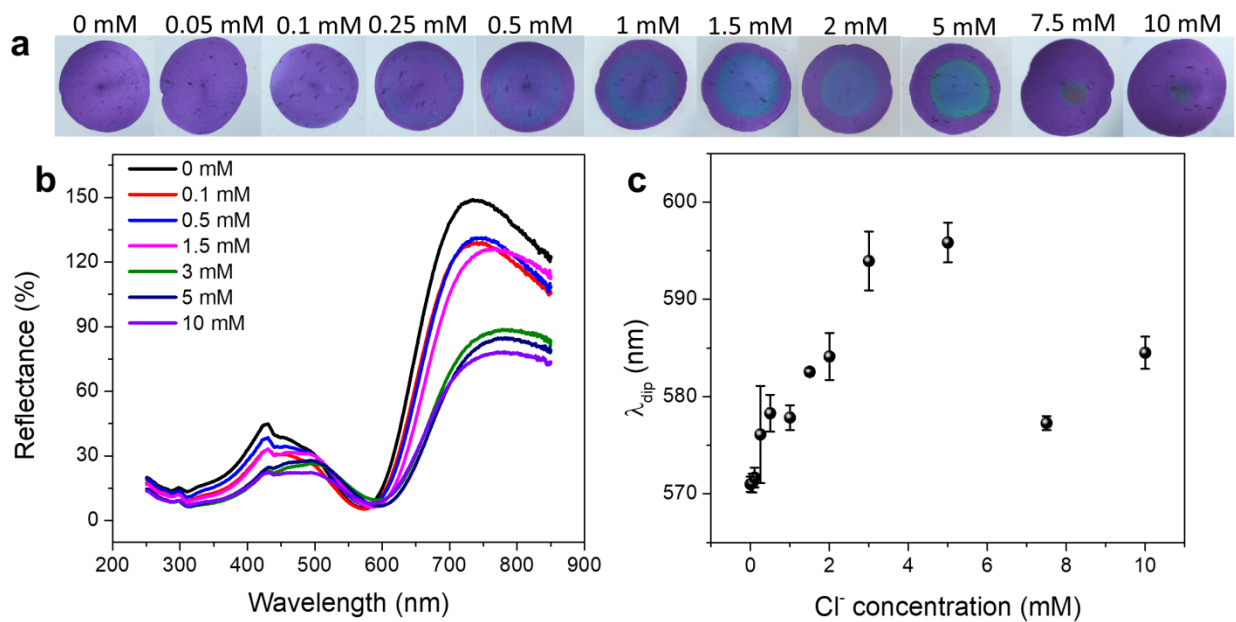

**Figure S7.** a) Photographs and b) reflectance spectra of MagPlas APA<sub>184</sub> impregnated with 100



mM AgNO<sub>3</sub> after adding solutions with different Cl<sup>-</sup> ion concentrations (C<sub>Cl</sub>). c) The dependence of  $\lambda_{\text{dip}}$  on Cl<sup>-</sup> ion concentrations of MagPlas APA<sub>184</sub> impregnated with 100 mM AgNO<sub>3</sub> concentration.

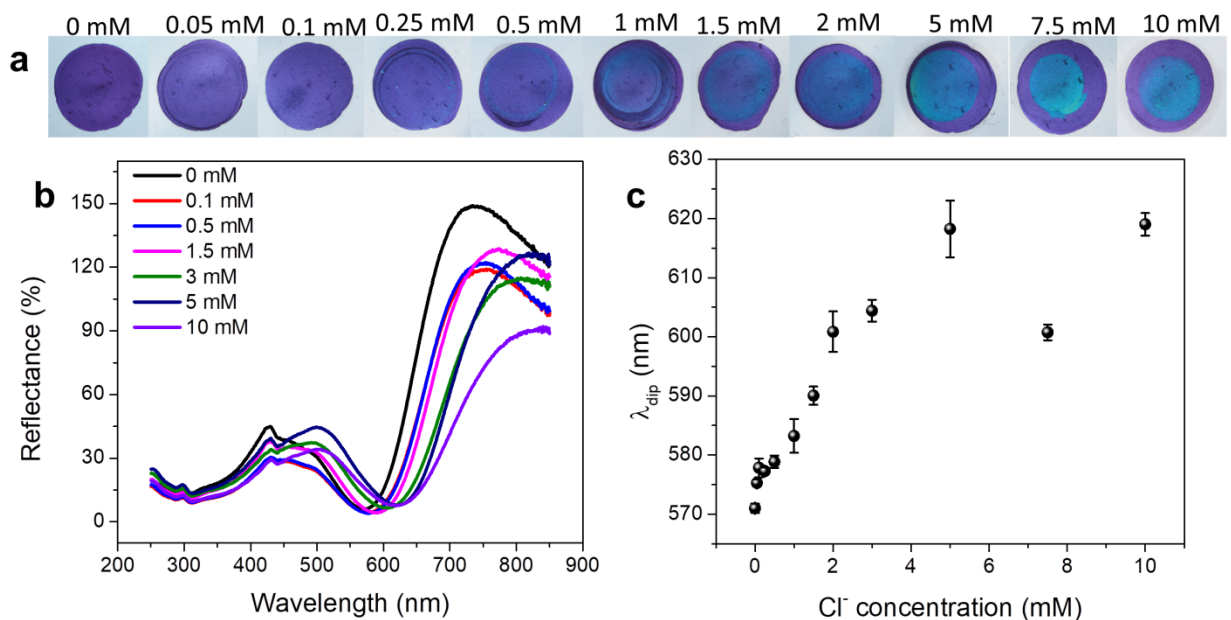

**Figure S8.** a) Photographs and b) reflectance spectra of MagPlas APA<sub>184</sub> impregnated with 500 mM AgNO<sub>3</sub> after adding solutions with different Cl<sup>-</sup> ion concentrations (C<sub>Cl</sub>). c) The dependence of  $\lambda_{\text{dip}}$  on Cl<sup>-</sup> ion concentrations of MagPlas APA<sub>184</sub> impregnated with 500 mM AgNO<sub>3</sub> concentration.

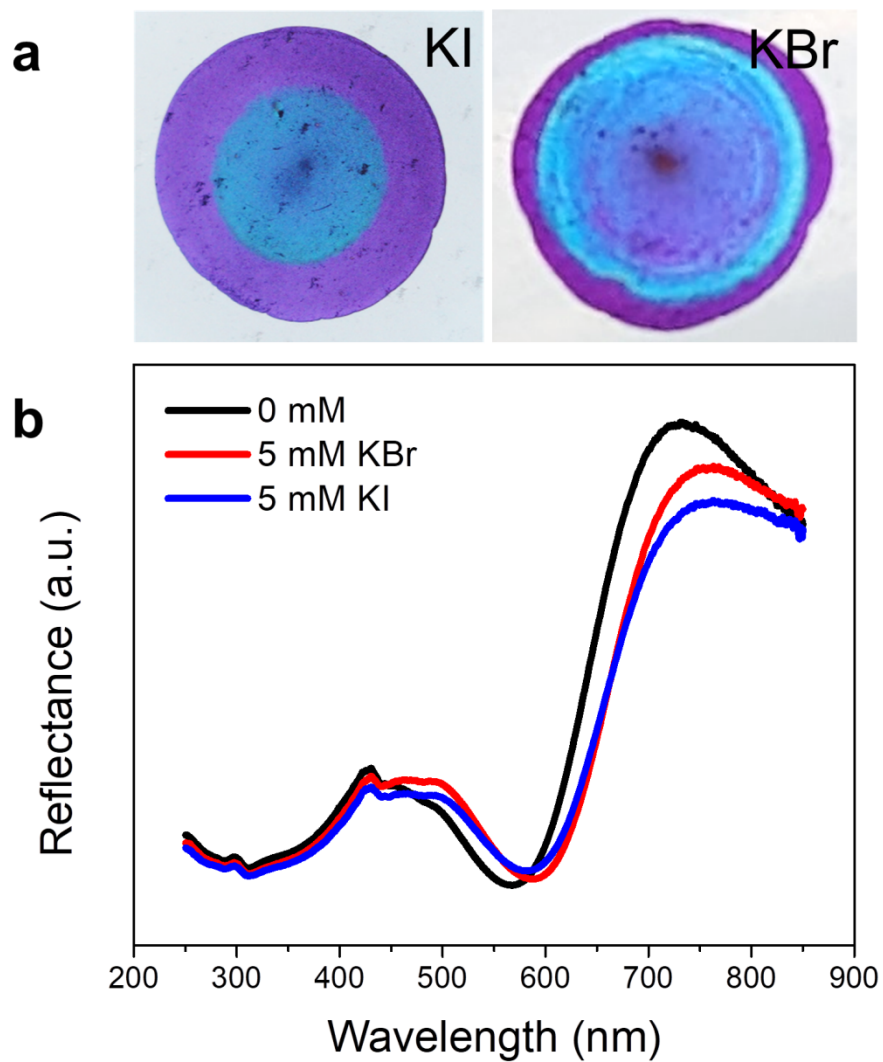

**Figure S9.** a) Photographs and b) reflectance spectra of MagPlas APA<sub>184</sub> impregnated with 250 mM AgNO<sub>3</sub> after adding 5mM KBr and 5 mM KI.



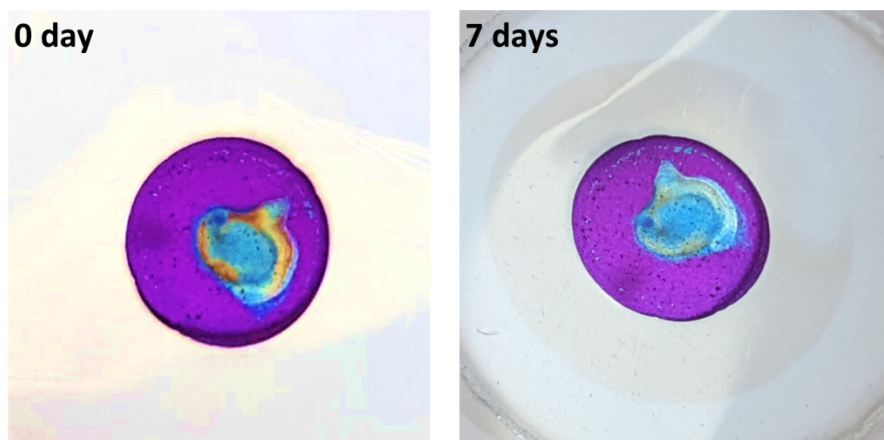

**Figure S10.** Photographs of MagPlas APA<sub>184</sub> impregnated with 250 mM AgNO<sub>3</sub>: a) right after and b) after 7 days adding 5mM NaCl.
